# Supplementary material
Source: PubMed Central journal article supplement (PMC3280546)
Supplement: emboj2011443s1.pdf [file emboj2011443s1.pdf]

## **Supplementary Information**

### ***Pten coordinates retinal neurogenesis by regulating Notch signaling***

Hong Seok Jo, Kyung Hwa Kang, Cheol O. Joe, and Jin Woo Kim

Contents

Supplemental Figure Legends

Supplemental Figure S1 – S7

Supplemental Table S1 – S2

## Supplemental Figure Legends

**Figure S1.** Split channel images of Pten and EGFP co-immunostaining results shown in Figure 1C. Scale bar in the picture represents 50 $\mu$ m.

**Figure S2.** Proximal expansion of *Pten*-deficient cells in *Pten-cko* retina. (A) Pten expression in P4 Pax6-aCre and Pten-cko littermate mouse retinas was examined by immunostaining with anti-Pten (red) with counterstaining of EGFP (green), which represents Pax6-aCre-positive cells. Pten was eliminated not only in *Pten-cko* distal retina (top row), but also in the proximal retina (bottom row). Asterisks (\*) indicate Pten expressed in astrocytes or blood vessels. (B) The R26R-lacZ-positive cells were distributed in the entire P4 *Pten-cko* retina in contrast to the distally restricted lacZ expression in the *Pax6-aCre* retina, indicating that the *Pten*-deficient cells expanded to the proximal retinal area of *Pten-cko* mice. Scale bars in the pictures represent 50 $\mu$ m.

**Figure S3.** *Pten*-deficient retinal cells are resistant to apoptotic cell death. (A) TUNEL-positive apoptotic cells among cells expressing R26-lacZ, which encodes  $\beta$ -galactosidase gene at R26 locus, in P5 *Pax6-aCre;R26-lacZ* or *Pten-cko;R26-lacZ* retina was measured by co-staining with the anti-terminal deoxynucleotidyl transferase (TdT) antibody (red) marking apoptotic cells and anti- $\beta$ -galactosidase antibody (green) detecting lacZ expression from R26R locus, respectively. Right column images are enlarged version of boxed areas in the left column. Arrows indicate TUNEL(+);R26-lacZ(-) cells, while arrowheads point TUNEL(+);R26-lacZ(+) cells. Dashed line indicates the retina-RPE border. (B) The TUNEL-positive apoptotic cells among the  $\beta$ -galactosidase-negative (TUNEL(+);lacZ(-)/lacZ(-); red in (A)) or the  $\beta$ -galactosidase-positive ((TUNEL(+);lacZ(+)/lacZ(+); yellow in (A)) were counted. The percentages of total TUNEL-positive cell counts among DAPI-stained total retinal cell counts were also shown in a graph (TUNEL(+)/Total). Scale bars in (A) represent 50 $\mu$ m. Error bars in (B) represent the standard deviations (SD). \*, p-value <0.01, \*\*, p-value <0.005.

**Figure S4. Enhanced mitotic index of Pten-cko retina.** (A) The numbers of mitotic cells in P0 and P4 retinas were measured by immunostaining with anti-phospho-histone H3

(pH3; red) antibody. Nuclei were counterstained with DAPI (blue). (B) The open squares and open triangles indicate cells in the distal and proximal areas of the *Pax6-aCre* retina, respectively, whereas the closed squares and solid triangles indicate cells in the distal and proximal areas of the *Pten-cko* retina. The open and closed arrows indicate the numbers of cells in *P6aCIEG* and *Pten-cko* retinas, respectively, at P0 and P4 stages. Y-axis values in graphs are the average numbers of pH3-positive cells per image; error bars denote SD of these values (n=4). Scale bars, 50  $\mu$ m.

**Figure S5.** Accelerated cell cycle progression in *Pten-cko* retina. (A) To measure the speed of cell division, the pregnant *Pax6-aCre* or *Pten-cko* mice were injected with CldU (30mg/kg) at 13.5 dpc (days post coital), and kept for 16 hours prior to the injection with IdU (30mg/kg). The embryos were then obtained from the CldU/IdU-injected pregnant mice at 3 hours after the injection with IdU, and the sections (12  $\mu$ m) were co-stained with rat anti-CldU (red) and rabbit anti-IdU (green) antibodies. Scale bar, 50 $\mu$ m. (B) Cells that are labeled by CldU, IdU, or both were counted, and shown as a graph. Open and filled bars indicate *Pax6-aCre* and *Pten-cko* results, respectively. (C) The cells labeled with both IdU and CldU were defined as cells that had reentered cell cycle during the period. The scores represent the average scores obtained from eight different samples of three independent litters. Error bars, SD. \*, p-value <0.05, \*\*, p-value <0.01.

**Figure S6.** (A) Expression of the Notch signaling components, *Notch1* and *Dll1*, in E14.5 or *Hes1* in E13.5 *Pax6-aCre* and *Pten-cko* retinas was examined by *in situ* RNA hybridization with DIG-labeled probes (see details in Materials and Methods). Dotted lines in (B) indicate basal margin of GCL.

**Figure S7.** Akt inhibits Notch-dependent transcription. Rat retinal progenitor R28 cells were co-transfected with *Hes1*-luciferase reporter construct in combination with Flag-NICD, HA-Akt(CA), or HA-Akt(KM), and the Notch-induced expression of luciferase was examined by measuring the luciferase activity. n = 6; \*\*, p-value <0.005; \*\*\*, p-value <0.001.

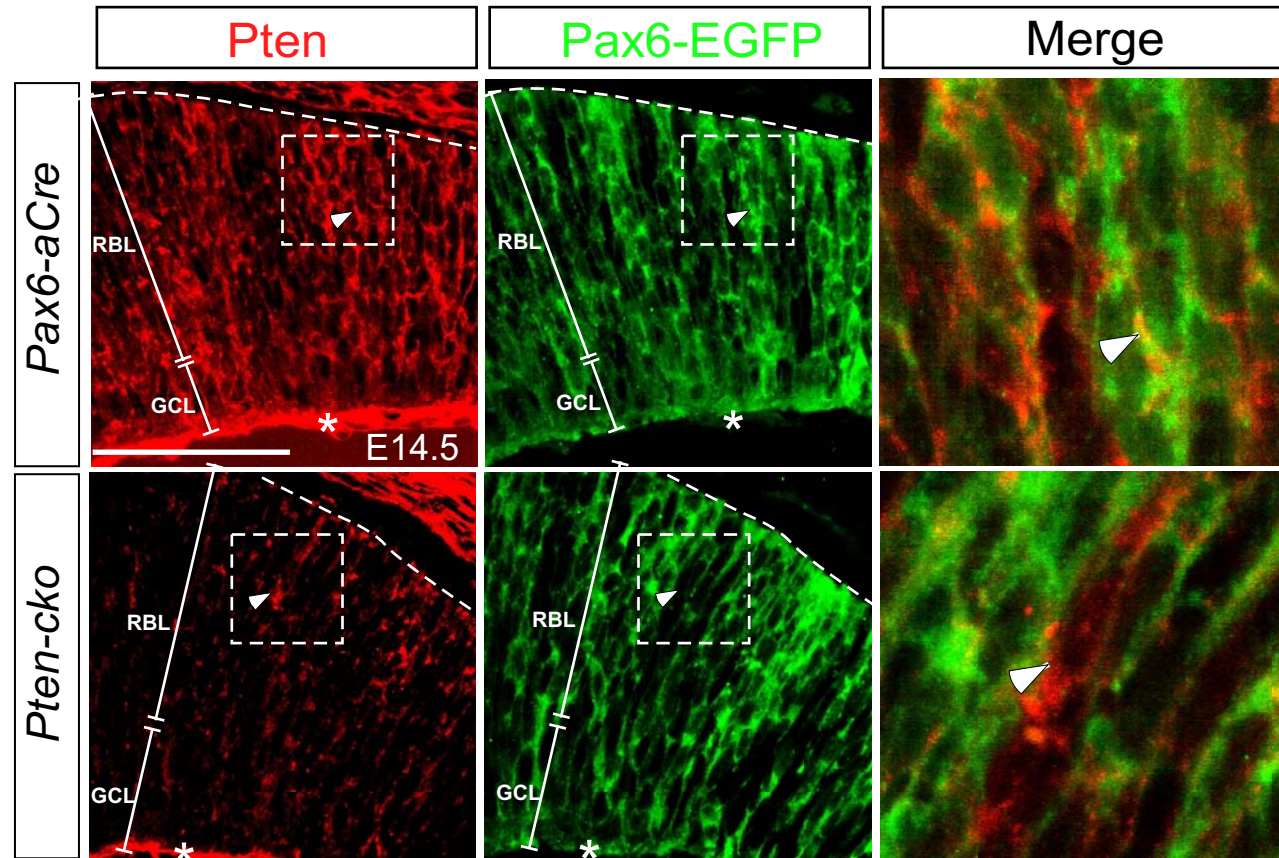

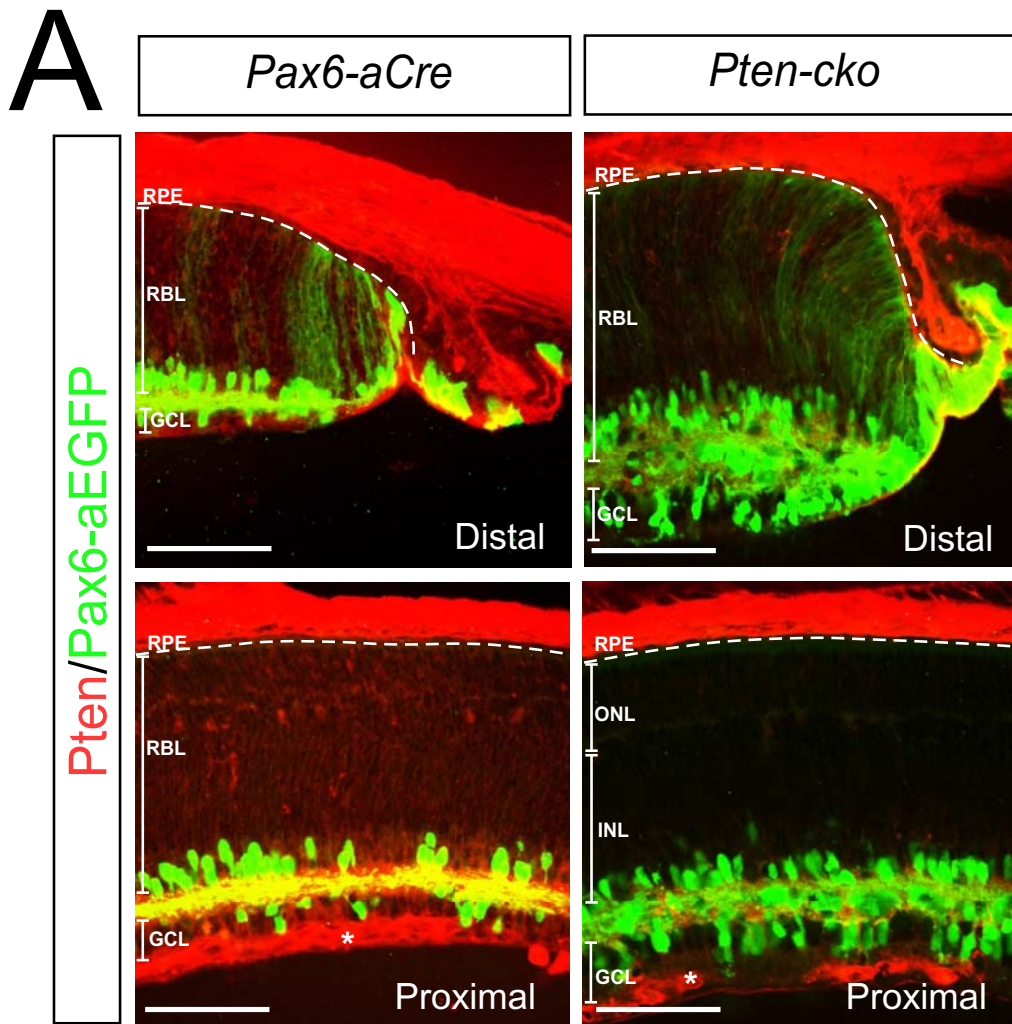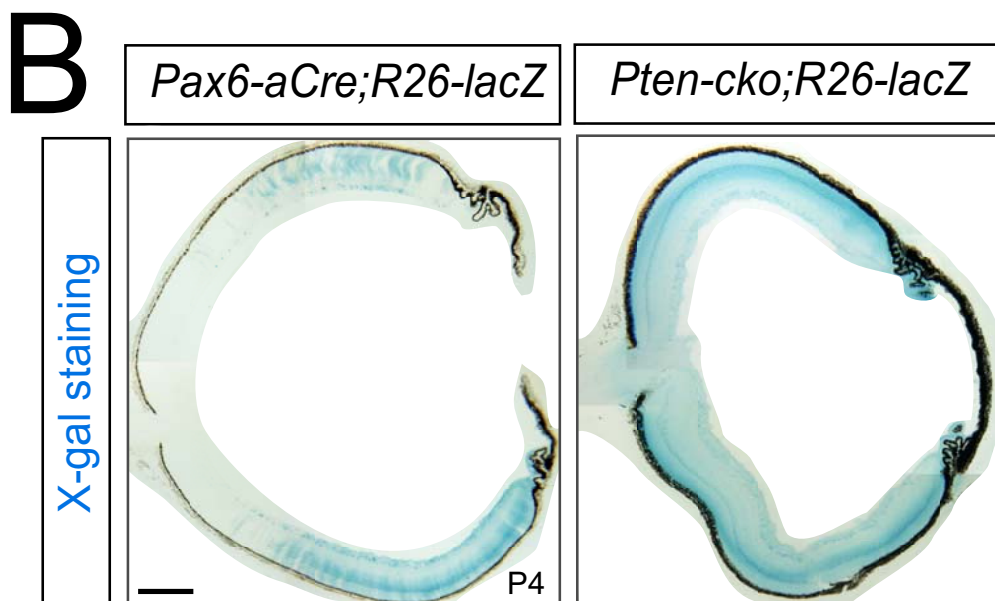

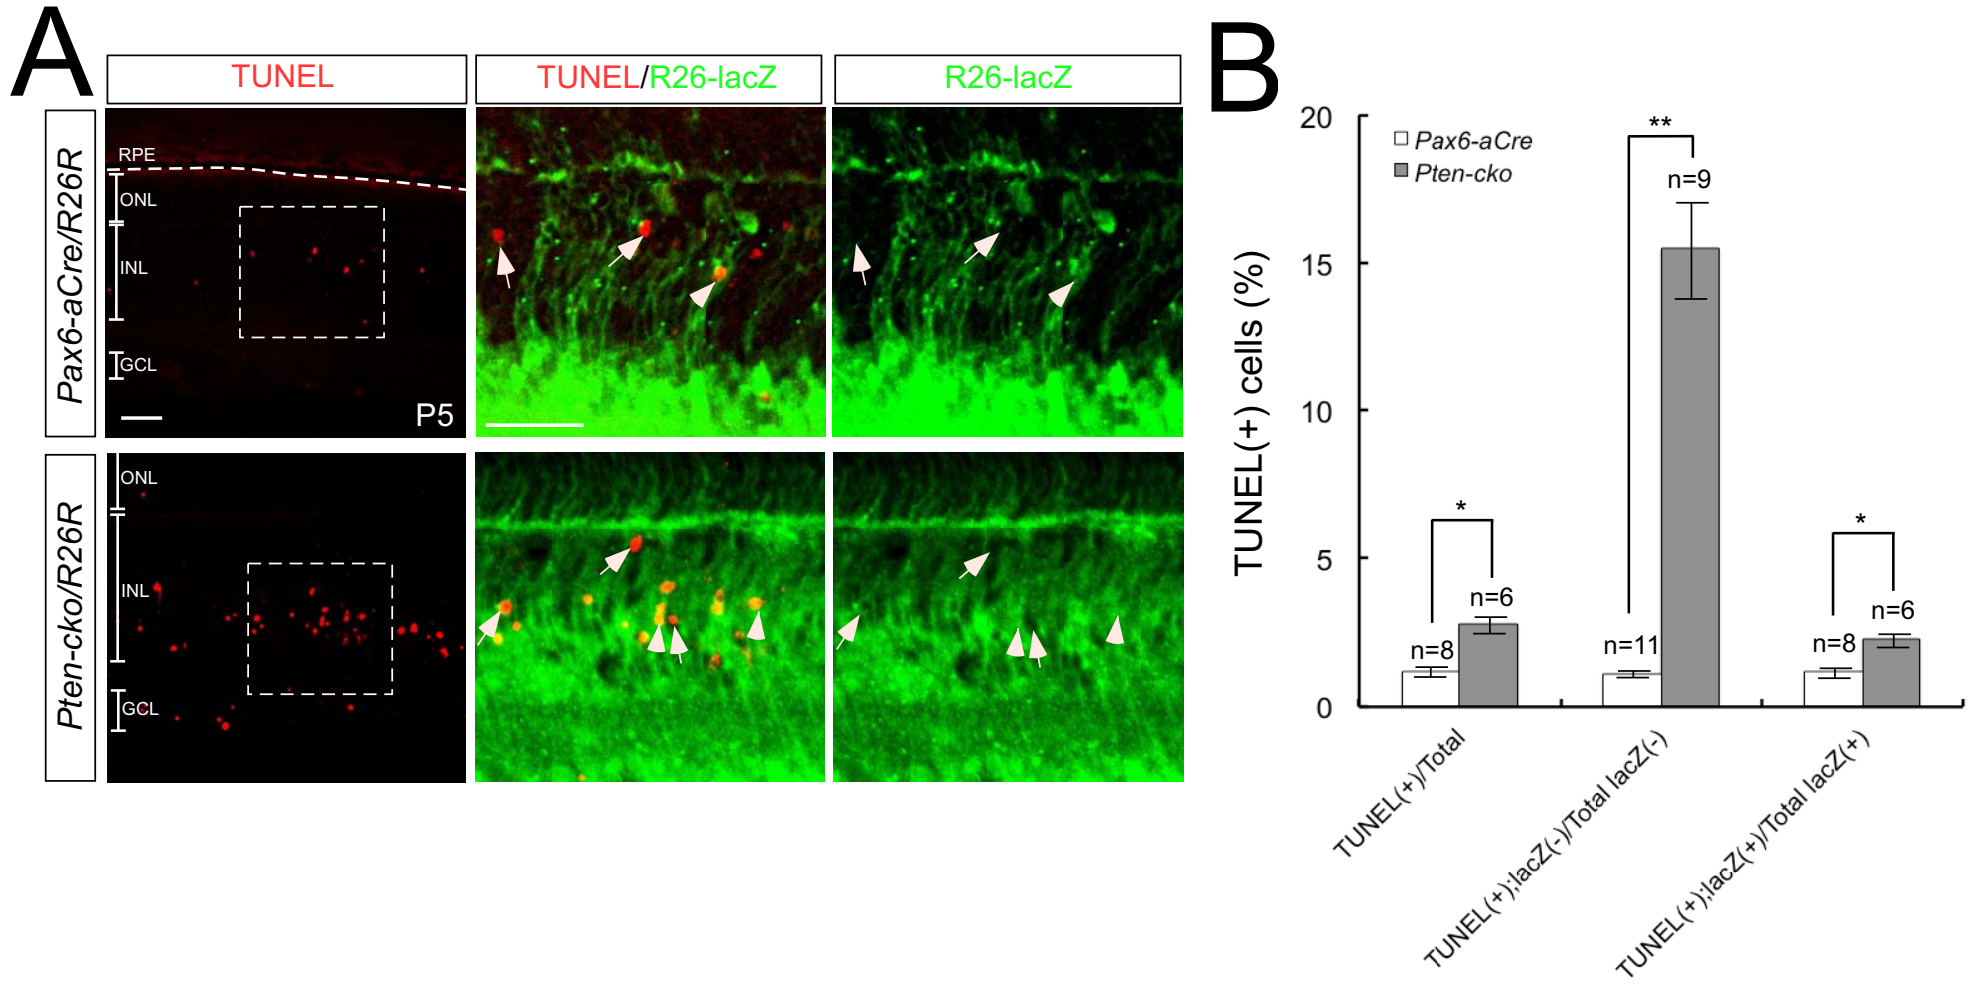



**A**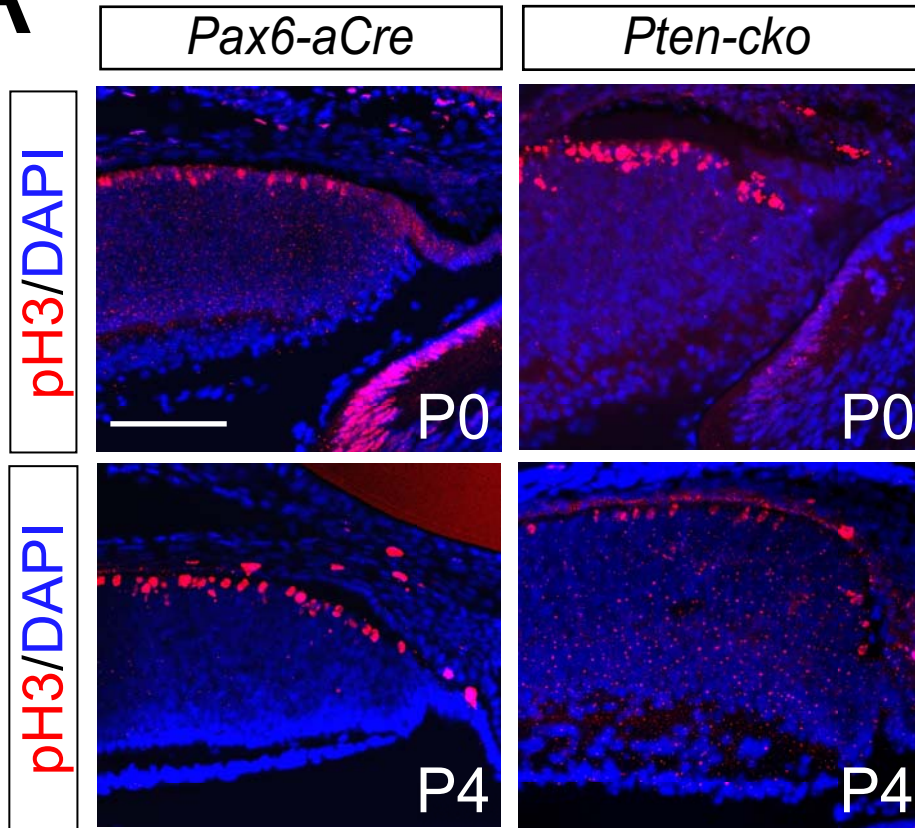**B**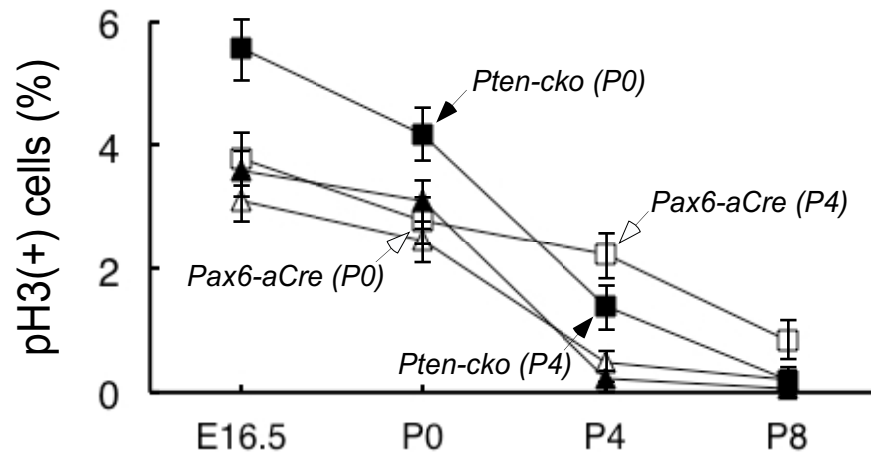

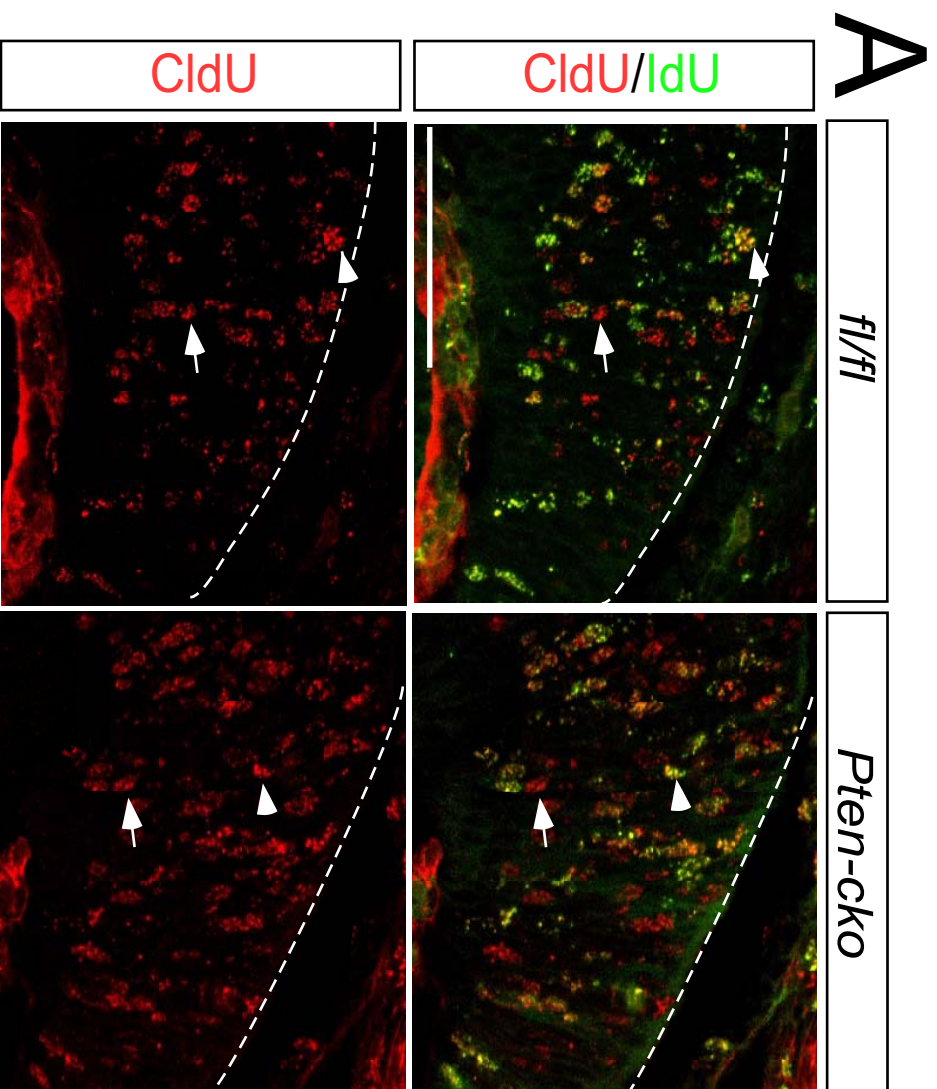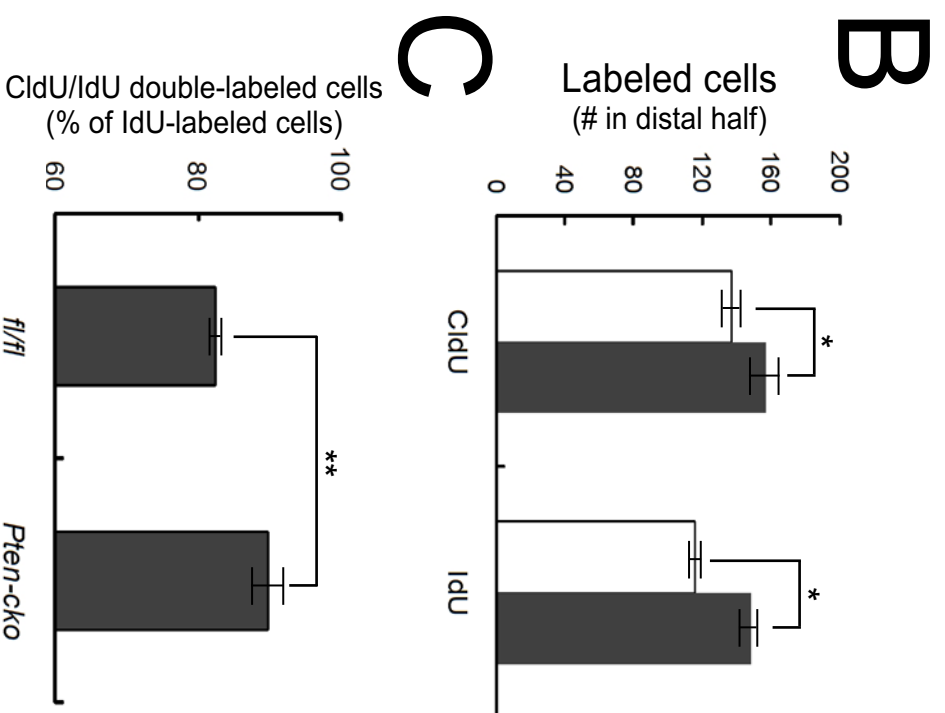



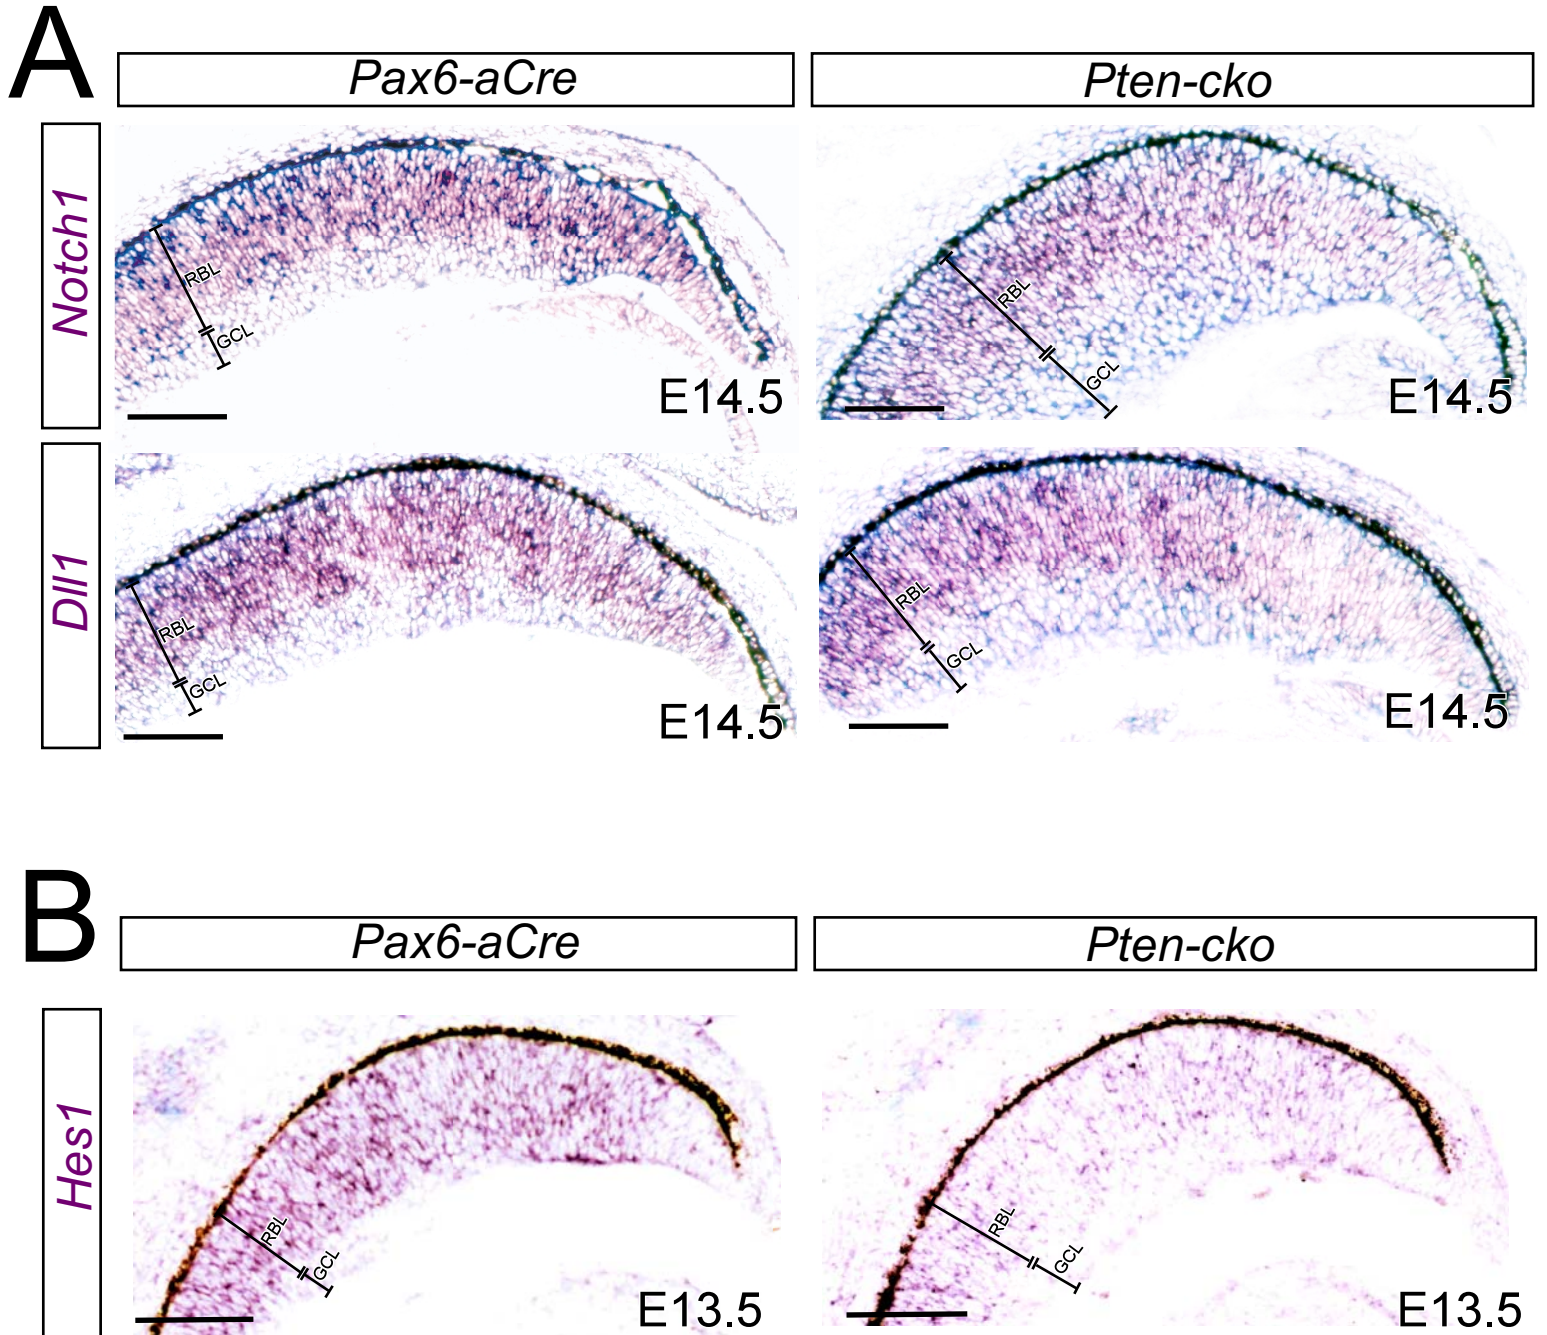

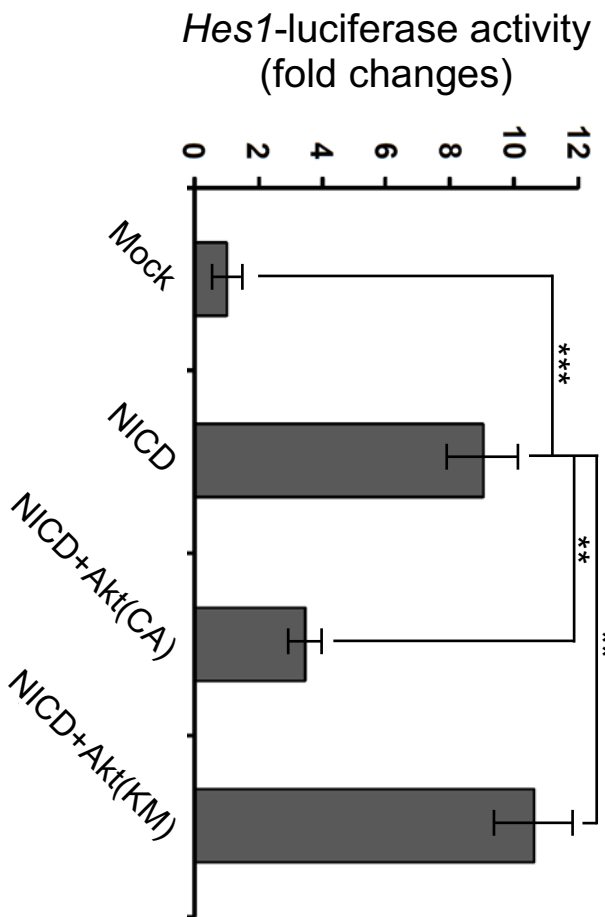

Table S1. Summary of retinal development depending on Notch and Akt activity

| Genotype                  | Notch activity | Akt activity | RPC population | Cell division speed | Retinal phenotype        |
|---------------------------|----------------|--------------|----------------|---------------------|--------------------------|
| <i>Pax6-aCre</i>          | 0              | 0            | 0              | 0                   | Normal development       |
| <i>Pten-cko</i>           | -              | ++           | -              | ++                  | Precocious RPC depletion |
| <i>Pax6-aCre;R26-NICD</i> | ++             | +            | +              | -                   | Extended RPC maintenance |
| <i>Pten-ckoR26-NICD</i>   | ++             | ++           | ++             | ++                  | Retinal hyperplasia      |

## Supplementary Table 2. List of antibodies used in this study

| <u>Antigen</u>                      | <u>Type</u>           | <u>Target</u>                                     | <u>Source</u>                                  |
|-------------------------------------|-----------------------|---------------------------------------------------|------------------------------------------------|
| Akt (5G3)                           | Mouse monoclonal      |                                                   | Cell Signaling Technology                      |
| $\beta$ -actin                      | Mouse monoclonal      | Western blot control                              | Abchem                                         |
| b-galactosidase (40-1a)             | Mouse monoclonal      |                                                   | Developmental Study Hybridoma Bank             |
| b-galactosidase                     | Rabbit polyclonal     |                                                   | Cappel                                         |
| G/R opsin                           | Rabbit monoclonal     | Cone photoreceptors (cPR)                         | Chemicon (Milipore)                            |
| BrdU(BU1/75(ICR1))                  | Rat monoclonal        | Proliferating cells (Used also for CldU staining) | Abcam                                          |
| BrdU(clone B44)                     | Mouse monoclonal      | Proliferating cells (Used also for IdU staining)  | BD Pharmingen                                  |
| Bm3b                                | Goat polyclonal       | Retinal ganglion cell (RGC)                       | Santa Cruz Biotechnology                       |
| Calbindin D-28                      | Rabbit polyclonal     | Horizontal cell (HZ); Amacrine cell (AC) subset   | Chemicon (Milipore)                            |
| CBF1/RBPJ-kappa                     | Goat polyclonal       |                                                   | R&D systems                                    |
| Chx10                               | Guinea pig polyclonal | Retinal progenitor cell (RPC), Bipolar cell (BP)  | Gift from Dr. Sam Pfaff (Salk Institute)       |
| Crx                                 | Rabbit polyclonal     | Photoreceptors precursor                          | Santa Cruz Biotechnology                       |
| cyclin A1                           | Mouse monoclonal      | S phase cell cycle marker                         | Santa Cruz Biotechnology                       |
| cyclin B1                           | Mouse monoclonal      | G2/M phase cell cycle marker                      | Santa Cruz Biotechnology                       |
| EGFP                                | Mouse monoclonal      |                                                   | Invitrogen                                     |
| EGFP                                | Rabbit polyclonal     |                                                   | Invitrogen                                     |
| Flag                                | Rabbit polyclonal     |                                                   | Cell Signaling Technology                      |
| Flag(M2)                            | Mouse monoclonal      |                                                   | Stratagene                                     |
| Glutamine synthetase (GS)           | Rabbit polyclonal     | Muller glia (MG)                                  | Sigma                                          |
| HA (HA-7)                           | Mouse monoclonal      |                                                   | Sigma                                          |
| HA (Y-11)                           | Rabbit polyclonal     |                                                   | Santa Cruz Biotechnology                       |
| Hes1                                | Rabbit polyclonal     | RPC                                               | Gift from Dr. Ryoichiro Kageyama (Osaka Univ.) |
| Islet1                              | Guinea pig polyclonal | Post-mitotic retinal neurons                      | Gift from Dr. Sam Pfaff (Salk Institute)       |
| Maml1                               | Rabbit polyclonal     | Notch transcription complex                       | Cell Signaling Technology                      |
| Math5                               | Rabbit polyclonal     | Post-mitotic retinal neurons                      | Chemicon (Milipore)                            |
| Myc                                 | Rabbit polyclonal     |                                                   | Cell Signaling Technology                      |
| Myc(9E10)                           | Mouse monoclonal      |                                                   | Sigma                                          |
| NeuroD1                             | Rabbit polyclonal     | Post-mitotic retinal neurons                      | Chemicon (Milipore)                            |
| NICD                                | Rabbit polyclonal     | gamma-secretase cleaved Notch1 in immunostai      | Abcam                                          |
| NICD                                | Rabbit polyclonal     | gamma-secretase cleaved Notch1 in Western blk     | Cell Signaling Technology                      |
| Notch1                              | Rabbit polyclonal     | C-terminus of Notch1                              | Cell Signaling Technology                      |
| p27                                 | Mouse monoclonal      | G1 phase cell cycle marker                        | BD                                             |
| Pax6                                | Mouse monoclonal      | RPC; AC; RGC                                      | Developmental Study Hybridoma Bank             |
| phosphor-Akt(Thr308)                | Rabbit polyclonal     | Active Akt                                        | Cell Signaling Technology                      |
| phosphor-Akt(Thr473) (587F11)       | Mouse monoclonal      | Active Akt                                        | Cell Signaling Technology                      |
| phosphor-Akt(Thr473) (IHC-specific) | Rabbit polyclonal     | Active Akt                                        | Cell Signaling Technology                      |
| phosphor-histone H3                 | Rabbit polyclonal     | Mitotic nuclei                                    | Upstate                                        |
| Protein kinase C alpha1             | Mouse monoclonal      | BP                                                | Calbiochem                                     |
| Prox1                               | Rabbit polyclonal     | RPC; HZ; AC                                       | Chemicon (Milipore)                            |
| PTEN                                | Rabbit polyclonal     | PTEN                                              | BD Pharmingen                                  |
| PTEN                                | Mouse monoclonal      | PTEN                                              | R&D systems                                    |
| Recoverin                           | Mouse monoclonal      | Photoreceptors (rod/cone)                         | Chemicon (Milipore)                            |
| Rhodopsin                           | Mouse monoclonal      | Rod photoreceptor (rPR)                           | Chemicon (Milipore)                            |
| Sox2                                | Goat polyclonal       | RPC & AC subset                                   | Santa Cruz Biotechnology                       |
| Sox9                                | Rabbit polyclonal     | RPC (embryonic) & MG precursor & MG               | Santa Cruz Biotechnology                       |
| Tuj1 (4H1)                          | Mouse monoclonal      | Neuron-specific tubulin beta-3                    | BABCo                                          |
| Ubiquitin                           | Mouse monoclonal      |                                                   | Chemicon (Milipore)                            |
