# Supplementary material
Source: PubMed Central journal article supplement (PMC3280546)

Figure 5C

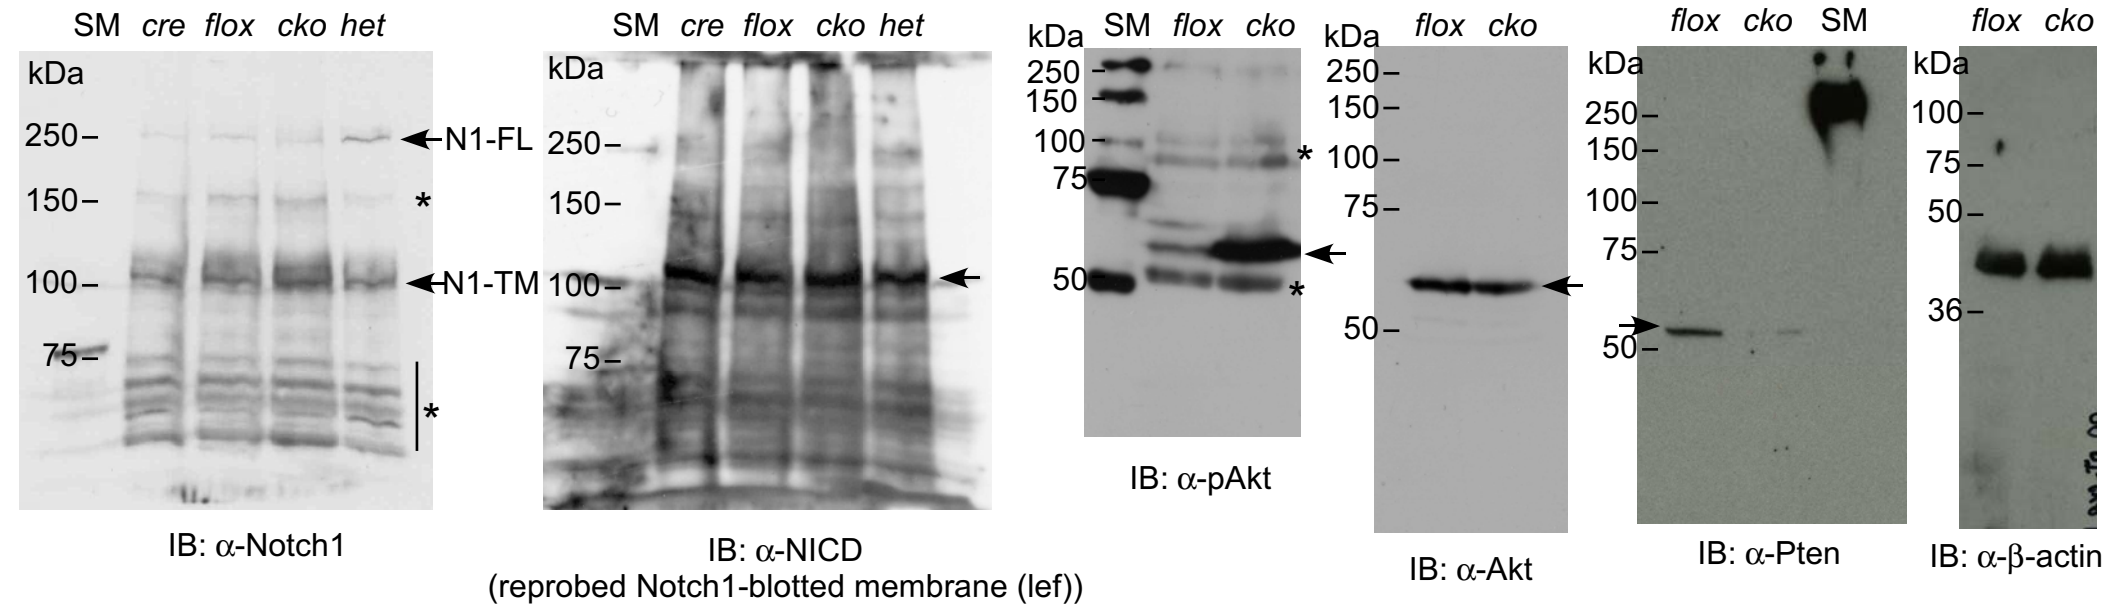

Figure 5D

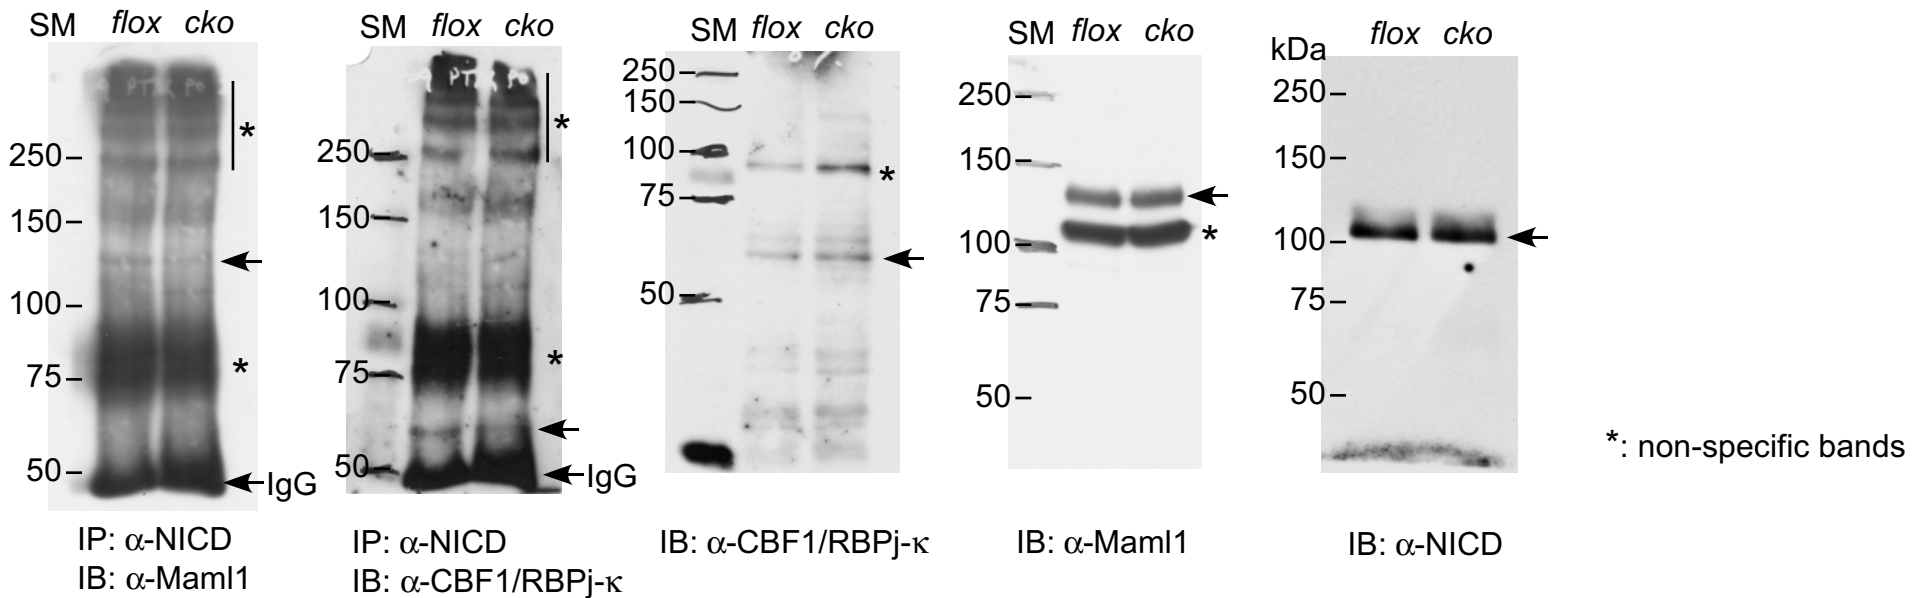

Supplement: emboj2011443s2.pdf [file emboj2011443s2.pdf]
